# Supplementary material
Source: MDPI journal article supplement (https://www.mdpi.com/2072-4292/10/9/1362)
Supplement: s1 [file s1]

## Supplementary Material: Pix4DMapper Pro<sup>®</sup> data outputs

This supplementary material has the purpose of reporting the Pix4DMapper Pro<sup>®</sup> outputs of the UAS SfM-photogrammetry. The UAS-imagery data were taken in August 2018 using the DJI Phantom 3 Pro. The outputs were processed in the professional drone mapping and photogrammetry software, Pix4DMapper Pro<sup>®</sup> in February 5th of 2018. The Pix4DMapper Pro<sup>®</sup> report is shown in Table S1 and the statistics in Table S2. In summary, the Pix4DMapper Pro<sup>®</sup> outputs resulted in the following: (1) the area spanned was 0.276 km<sup>2</sup>; (2) the dataset consisted of 294 images; (3) the mean projection error, in pixels, was equal to 0.255; and (4) the median of keypoints per images was 45,222. The mean absolute camera uncertainty values were found to be 0.15 m in the  $x$  and  $y$  directions and 0.374 m in the  $z$  direction.

Table S.1: Pix4D report of the SfM-photogrammetry taken in August 2017 and processed in February of 2018

| Summary                                                        |                                                                                    |
|----------------------------------------------------------------|------------------------------------------------------------------------------------|
| Project                                                        | Finn Creek 21 Reservoir                                                            |
| Processed                                                      | 2018-02-05 15:59:54                                                                |
| Camera Model Name(s)                                           | FC300X.3.6_4000>3000 (RGB)                                                         |
| Average Ground Sampling Distance (GSD)                         | 4.62 cm / 1.82 in                                                                  |
| Area Covered                                                   | 0.276 km <sup>2</sup> / 27.6250 ha<br>0.11 sq. mi. / 68.2981 acres                 |
| Quality Check                                                  |                                                                                    |
| Images                                                         | median of 45222 keypoints per image                                                |
| Dataset                                                        | 294 out of 294 images                                                              |
| Camera Optimization                                            | 1.71% relative difference between initial and optimized internal camera parameters |
| Matching                                                       | median of 18394.1 matches per calibrated image                                     |
| Georeferencing                                                 | Yes, 5 GCPs                                                                        |
| Bundle Block Adjustment Details                                |                                                                                    |
| Number of 2D Keypoint Observations for Bundle Block Adjustment | 5509080                                                                            |
| Number of 3D Points for Bundle Block Adjustment                | 1982570                                                                            |
| Mean Reprojection Error [pixels]                               | 0.255                                                                              |

Table S.2: Statistics of the SfM-photogrammetry taken in August 2017 and processed in February 2018. It is shown: a) camera uncertainties and b) camera parameters

| <b>a. Absolute Camera Position and Orientation Uncertainties</b> |       |       |       |                |              |                |
|------------------------------------------------------------------|-------|-------|-------|----------------|--------------|----------------|
|                                                                  | X [m] | Y [m] | Z [m] | Omega [degree] | Phi [degree] | Kappa [degree] |
| Mean                                                             | 0.155 | 0.155 | 0.374 | 0.111          | 0.116        | 0.042          |
| Sigma                                                            | 0.025 | 0.025 | 0.082 | 0.003          | 0.002        | 0.001          |

| <b>b. Internal Camera Parameters</b> |                                |                                |                                |        |       |        |        |        |
|--------------------------------------|--------------------------------|--------------------------------|--------------------------------|--------|-------|--------|--------|--------|
|                                      | Focal Length                   | Principal Point x              | Principal Point y              | R1     | R2    | R3     | T1     | T2     |
| Initial Values                       | 2285.722 [pixel]<br>3.610 [mm] | 2000.006 [pixel]<br>3.159 [mm] | 1500.003 [pixel]<br>2.369 [mm] | -0.014 | 0.013 | -0.000 | 0.001  | 0.000  |
| Optimized Values                     | 2246.433 [pixel]<br>3.548 [mm] | 2013.005 [pixel]<br>3.179 [mm] | 1512.031 [pixel]<br>2.388 [mm] | -0.008 | 0.008 | 0.004  | -0.001 | -0.000 |
| Uncertainties (Sigma)                | 1.147 [pixel]<br>0.002 [mm]    | 0.178 [pixel]<br>0.000 [mm]    | 0.121 [pixel]<br>0.000 [mm]    | 0.000  | 0.000 | 0.000  | 0.000  | 0.000  |
